# Supplementary material for: Mechanistic investigation of the gold-catalyzed aerobic oxidation of aldehydes: added insight from Hammett studies and isotopic labelling experiments
Source: Royal Society of Chemistry journal article supplement (doi:10.1039/b803270j), 2008-01-01

## ELECTRONIC SUPPLEMENTARY INFORMATION

### Mechanistic Investigation of the Gold-Catalyzed Aerobic Oxidation of Aldehydes: Added Insight from Hammett Studies and Isotopic Labelling Experiments

Peter Fristrup,<sup>\*a</sup> Louise Bahn Johansen,<sup>a</sup> and Claus Hviid Christensen<sup>\*a</sup>

*Center for Sustainable and Green Chemistry, Department of Chemistry,  
Technical University of Denmark, Kemitorvet, DK-2800, Lyngby, Denmark.*

#### Table of Contents

|                                                                 |    |
|-----------------------------------------------------------------|----|
| Competition Experiments                                         | 2  |
| General methods, gas chromatography                             | 3  |
| Table of retention times                                        | 3  |
| Competition experiment, Table 1, entry 1, H vs. CN              | 4  |
| Competition experiment, Table 1, entry 2, H vs. COOMe           | 5  |
| Competition experiment, Table 1, entry 3, H vs. Cl              | 6  |
| Competition experiment, Table 1, entry 4, H vs. CF <sub>3</sub> | 7  |
| Competition experiment, Table 1, entry 5, H vs. Me              | 8  |
| Competition experiment, Table 1, entry 6, H vs. OMe             | 9  |
| Determination of KIE indirect, D vs. Me                         | 10 |
| Determination of KIE direct, H vs. D                            | 11 |

### Competition Experiments

In each experiment 2 mmol benzaldehyde was oxidized in competition with 2 mmol of the *para*-substituted benzaldehyde under investigation. Anisol was used as internal standard (1 mmol), and in addition a catalytic amount of base was required (10 mol% NaOH). In each experiment 157 mg gold catalyst (1% wt/wt Au/TiO<sub>2</sub>, corresponding to a Au:substrate ratio of 1:500) was used, which had been acquired from the World Gold Council (Gold reference catalyst #02-07, Sued-Chemie Catalysts Japan). The reactions were carried in methanol (10 mL) at room temperature in an open system (to allow a supply of air), which was fitted with a reflux condenser to avoid solvent evaporation. Aliquots of 50  $\mu$ L were withdrawn from the reaction mixture using the following scheme: before addition of catalyst, after addition of catalyst, and then after 5, 10, 15, 30, 45, 60, 90, 120, 150, 180, 240, 300, and 360 mins reaction time, and then diluted with diethyl ether to 1 mL. GC analysis was carried using a Shimadzu GC-2010 system fitted with an Equity-1 column (30m  $\times$  0.25mm  $\times$  0.25 $\mu$ m) using the following temperature profile: 100  $^{\circ}$ C (hold 10 min), then 5  $^{\circ}$ C/min to 200  $^{\circ}$ C, followed by 10  $^{\circ}$ C/min to 300  $^{\circ}$ C (hold 5 min).

For the indirect determination of KIE an additional competition experiment was carried out as stated above, where deuterated benzaldehyde was oxidized in competition with *p*-Me-benzaldehyde, which allowed for a straight-forward separation by GC.

The direct determination of KIE was performed as stated above using 2 mmol of both deuterated and normal benzaldehyde. The samples were analyzed using Agilent Technologies 6850 GC coupled to 5975C VL MSD fitted with a HP-5MS column (30 m  $\times$  0.25 mm  $\times$  0.25). The temperature profile was: 100  $^{\circ}$ C (hold 5 min) and then a ramp (40  $^{\circ}$ C /min) to 300  $^{\circ}$ C. Single ion monitoring was selected (M=105, 106, 107), which allowed the use of the molecular ion of each benzaldehyde to be quantified relative to the molecular ion of the internal standard (anisole, M=105). <sup>36</sup>O<sub>2</sub> (500 mL, 99% isotopic purity) and MeO<sup>18</sup>H (1 mL, 95% isotopic purity) was acquired from Sigma-Aldrich and used as received. The reactions were carried out in 1 mL of methanol as solvent, and using a balloon to supply the isotopically labelled dioxygen. Samples were withdrawn after 2 hrs, 4 hrs, 8 hrs, and 24 hrs and analyzed by GC-MS in SIM mode (M=136, 137, 138, and 139).

### General methods, gas chromatography

Gas chromatography were performed using a Shimadzu GC-2010 system equipped with an autosampler. Method A involved the use of a 30m x 0.25 mm x 0.25  $\mu$ m Equity-1 column, which were used in conjunction with the following temperature program: 100 °C (5min), then a ramp (10 °C/min) to 300 °C which were kept for 10 mins. Method B involved the use of a 15m x 0.10 mm x 0.10  $\mu$ m Equity-1 column, which were used in conjunction with the temperature program: 100 °C (5 min) then a ramp (40 °C/min) to 300 °C which were kept for 5 min (so-called FastGC).

### Retention Times

| Compound                                    | Method A<br>(30m column) | Method B<br>(15m column) |
|---------------------------------------------|--------------------------|--------------------------|
| Anisole                                     | 3.37 min                 | 1.59 min                 |
| Benzaldehyde                                | 3.78 min                 | 1.79 min                 |
| pCH <sub>3</sub> -benzaldehyde              | 5.90 min                 | 2.60 min                 |
| pCF <sub>3</sub> -benzaldehyde              | 3.57 min                 | 1.65 min                 |
| pCl-benzaldehyde                            | 6.97 min                 | 3.08 min                 |
| pOMe-benzaldehyde                           | 12.30 min                | 6.15 min                 |
| pCN-benzaldehyde                            | 10.38 min                | 4.70 min                 |
| pCOOMe-benzaldehyde                         | 16.19 min                | 7.35 min                 |
| Benzaldehyde methyl ester                   | 6.30 min                 | 3.01 min                 |
| pCH <sub>3</sub> -benzaldehyde methyl ester | 10.93 min                | 4.73 min                 |
| pCF <sub>3</sub> -benzaldehyde methyl ester | 5.85 min                 | 2.58 min                 |
| pCl-benzaldehyde methyl ester               | 12.73 min                | 5.74 min                 |
| pOMe-benzaldehyde methyl ester              | 17.27 min                | 7.76 min                 |
| pCN-benzaldehyde methyl ester               | 16.05 min                | 7.33 min                 |
| pCOOMe-benzaldehyde methyl ester            | 21.15 min                | 8.49 min                 |

**Table 1, entry 1: Benzaldehyde and *para*-cyano-benzaldehyde:**

**Amounts of reagents used:**

|                                    | m (mg) |
|------------------------------------|--------|
| Benzaldehyde                       | 213.5  |
| 4-Cyanobenzaldehyde                | 269.0  |
| Methanol                           | 8026.4 |
| NaOH                               | 17.8   |
| Anisole                            | 119.0  |
| Catalyst (1% Au/TiO <sub>2</sub> ) | 157.5  |

**Areas measured by GC:**

| Sample no. | Time (min)     | Anisol | PhCHO  | <i>p</i> CN-PhCHO | Conversion | Conversion            |
|------------|----------------|--------|--------|-------------------|------------|-----------------------|
|            |                |        |        |                   | PhCHO (%)  | <i>p</i> CN-PhCHO (%) |
| 1          | 0 – no cat.    | 88759  | 146551 | 103154            | 0.00       | 0.00                  |
| 2          | 0 – after cat. | 76986  | 125093 | 82212             | 0.02       | 0.08                  |
| 3          | 5              | 59419  | 95225  | 49707             | 0.03       | 0.28                  |
| 4          | 10             | 55630  | 87791  | 32823             | 0.04       | 0.49                  |
| 5          | 15             | 51040  | 78794  | 21625             | 0.07       | 0.64                  |
| 6          | 30             | 73452  | 110337 | 15636             | 0.09       | 0.82                  |
| 7          | 45             | 72099  | 105269 | 4236              | 0.12       | 0.95                  |
| 8          | 60             | 76552  | 109162 | 0                 | 0.14       | 1.00                  |
| 9          | 90             | 76848  | 103779 | 0                 | 0.18       | 1.00                  |
| 10         | 120            | 91239  | 114224 | 0                 | 0.24       | 1.00                  |
| 11         | 150            | 81553  | 95109  | 0                 | 0.29       | 1.00                  |
| 12         | 180            | 98760  | 110115 | 0                 | 0.32       | 1.00                  |
| 13         | 240            | 45646  | 40215  | 0                 | 0.47       | 1.00                  |
| 14         | 300            | 88253  | 67387  | 0                 | 0.54       | 1.00                  |
| 15         | 360            | 55331  | 32269  | 0                 | 0.65       | 1.00                  |

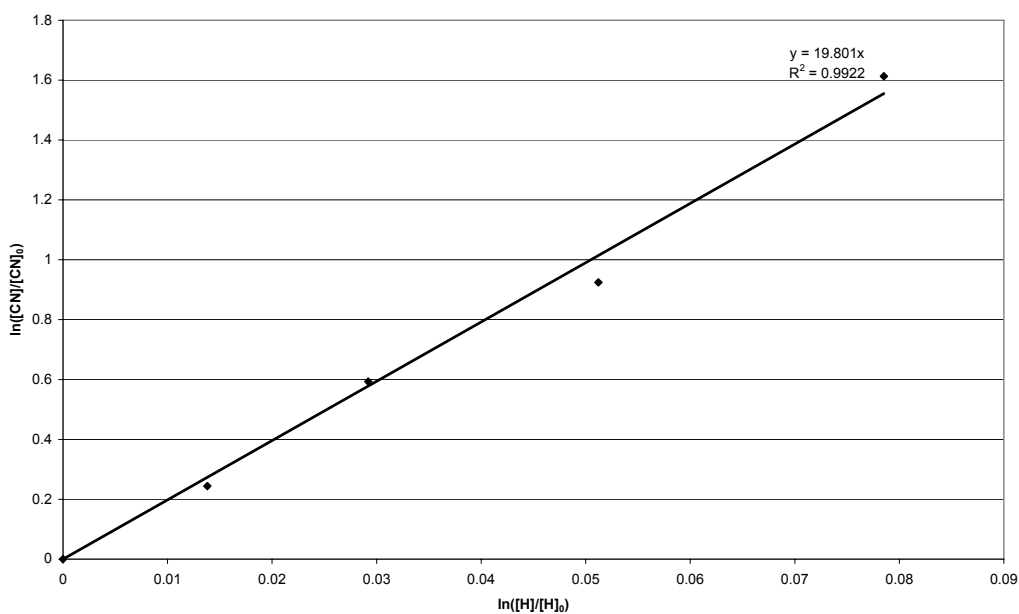

**Table 1, entry 2: Benzaldehyde and *para*-(carboxymethyl)-benzaldehyde:**

**Amounts of reagents used:**

|                                    | m (mg) |
|------------------------------------|--------|
| Benzaldehyde                       | 294.2  |
| 4-carboxymethyl benzaldehyde       | 382.4  |
| Methanol                           | 7932.8 |
| NaOH                               | 17.9   |
| Anisole                            | 129.6  |
| Catalyst (1% Au/TiO <sub>2</sub> ) | 157.3  |

**Areas measured by GC:**

| Sample no. | Time (min)     | Anisol | PhCHO  | <i>p</i> COOMe-PhCHO | Conversion PhCHO (%) | Conversion <i>p</i> COOMe-PhCHO (%) |
|------------|----------------|--------|--------|----------------------|----------------------|-------------------------------------|
| 1          | 0 – no cat.    | 114277 | 234070 | 171396               | 0.00                 | 0.00                                |
| 2          | 0 – after cat. | 89659  | 183156 | 134345               | 0.00                 | 0.00                                |
| 3          | 5              | 82138  | 164663 | 106449               | 0.02                 | 0.14                                |
| 4          | 10             | 78745  | 154472 | 78059                | 0.04                 | 0.34                                |
| 5          | 15             | 75360  | 145409 | 64333                | 0.06                 | 0.43                                |
| 6          | 30             | 85961  | 160636 | 36907                | 0.09                 | 0.71                                |
| 7          | 45             | 61807  | 106727 | 6165                 | 0.16                 | 0.93                                |
| 8          | 60             | 71782  | 124611 | 4865                 | 0.15                 | 0.95                                |
| 9          | 90             | 70603  | 114216 | 0                    | 0.21                 | 1.00                                |
| 10         | 120            | 71917  | 110491 | 0                    | 0.25                 | 1.00                                |
| 11         | 150            | 89624  | 129059 | 0                    | 0.30                 | 1.00                                |
| 12         | 180            | 91772  | 124050 | 0                    | 0.34                 | 1.00                                |
| 13         | 240            | 68657  | 76899  | 0                    | 0.45                 | 1.00                                |
| 14         | 300            | 106230 | 99190  | 0                    | 0.54                 | 1.00                                |
| 15         | 360            | 64979  | 50089  | 0                    | 0.62                 | 1.00                                |

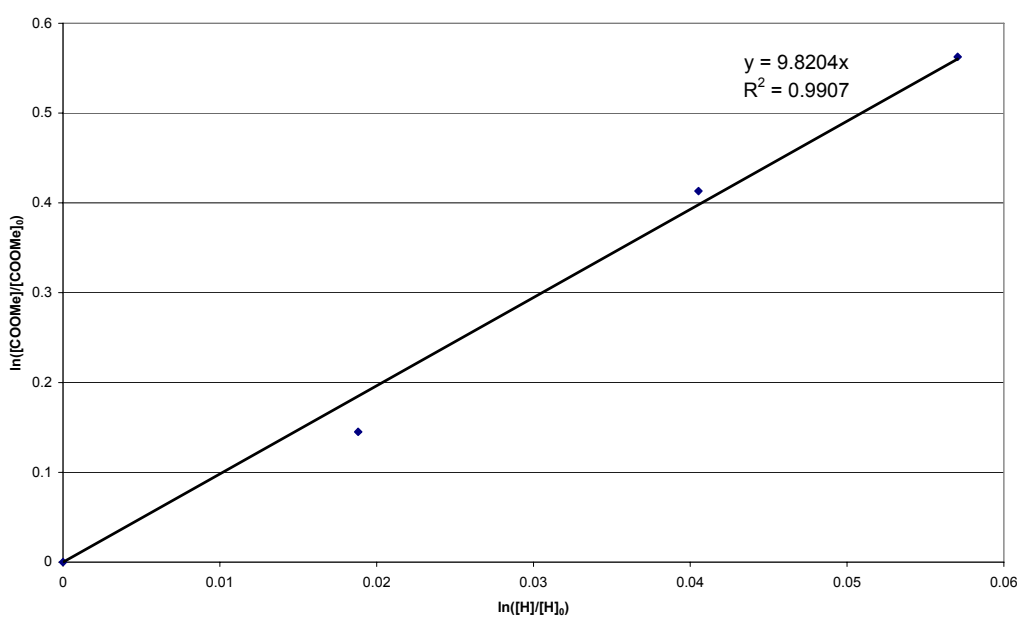

**Table 1, entry 3: Benzaldehyde and *para*-chloro-benzaldehyde:**

**Amounts of reagents used:**

|                                    | m (mg) |
|------------------------------------|--------|
| Benzaldehyde                       | 230.4  |
| 4-Chloro benzaldehyde              | 294.1  |
| Methanol                           | 7982.1 |
| NaOH                               | 18.9   |
| Anisole                            | 138.0  |
| Catalyst (1% Au/TiO <sub>2</sub> ) | 157.8  |

**Areas measured by GC:**

| Sample no. | Time (min)     | Anisol | PhCHO  | <i>p</i> Cl-PhCHO | Conversion | Conversion            |
|------------|----------------|--------|--------|-------------------|------------|-----------------------|
|            |                |        |        |                   | PhCHO (%)  | <i>p</i> Cl-PhCHO (%) |
| 1          | 0 – no cat.    | 109510 | 167735 | 160965            | 0.0        | 0.0                   |
| 2          | 0 – after cat. | 120259 | 183041 | 172079            | 0.6        | 2.7                   |
| 3          | 5              | 78176  | 115319 | 101977            | 3.7        | 11.3                  |
| 4          | 10             | 72635  | 103374 | 89337             | 7.1        | 16.3                  |
| 5          | 15             | 106996 | 148460 | 121777            | 9.4        | 22.6                  |
| 6          | 30             | 110582 | 145681 | 112316            | 14.0       | 30.9                  |
| 7          | 45             | 65170  | 83243  | 60656             | 16.6       | 36.7                  |
| 8          | 60             | 90486  | 114763 | 84166             | 17.2       | 36.7                  |
| 9          | 90             | 78391  | 96787  | 66718             | 19.4       | 42.1                  |
| 10         | 120            | 85685  | 104142 | 69321             | 20.6       | 45.0                  |
| 11         | 150            | 95022  | 112169 | 75485             | 22.9       | 46.0                  |
| 12         | 180            | 85939  | 98949  | 62945             | 24.8       | 50.2                  |
| 13         | 240            | 97147  | 107096 | 62370             | 28.0       | 56.3                  |
| 14         | 300            | 62025  | 64330  | 34118             | 32.3       | 62.6                  |
| 15         | 360            | 74119  | 73332  | 36516             | 35.4       | 66.5                  |

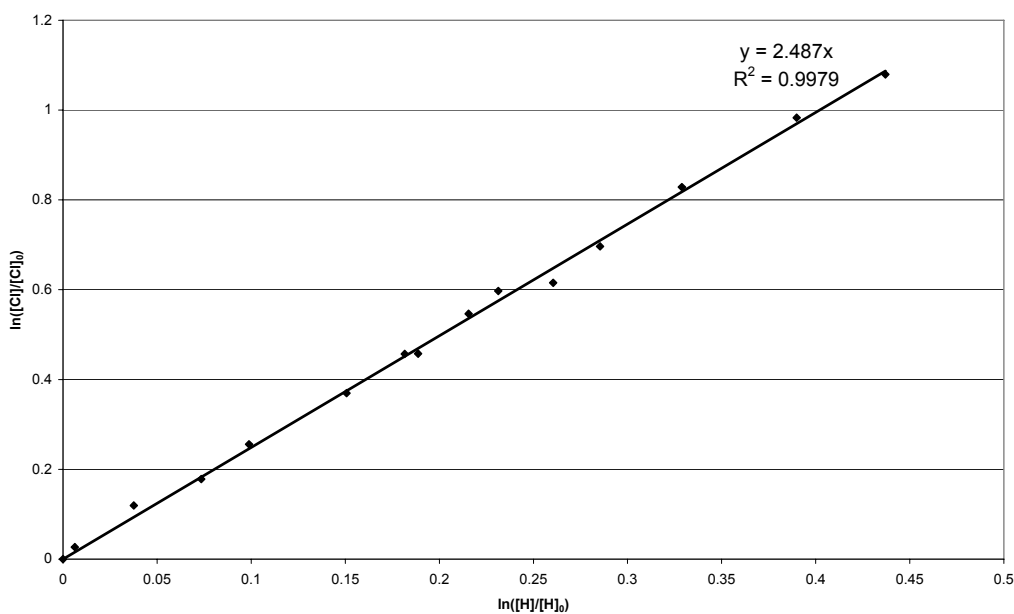

**Table 1, entry 4: Benzaldehyde and *para*-(trifluoromethyl)-benzaldehyde:**

**Amounts of reagents used:**

|                                    | m (mg) |
|------------------------------------|--------|
| Benzaldehyde                       | 257.4  |
| 4-(Trifluoromethyl)benzaldehyd     | 391.9  |
| Methanol                           | 8096.5 |
| NaOH                               | 17.6   |
| Anisole                            | 115.3  |
| Catalyst (1% Au/TiO <sub>2</sub> ) | 157.7  |

**Areas measured by GC:**

| Sample no. | Time (min)     | Anisol | PhCHO  | <i>p</i> CF <sub>3</sub> -PhCHO | Conversion PhCHO (%) | Conversion <i>p</i> CF <sub>3</sub> -PhCHO (%) |
|------------|----------------|--------|--------|---------------------------------|----------------------|------------------------------------------------|
| 1          | 0 – no cat.    | 48440  | 98284  | 106793                          | 0.0                  | 0.0                                            |
| 2          | 0 – after cat. | 74061  | 149396 | 158146                          | 0.6                  | 3.1                                            |
| 3          | 5              | 55353  | 105585 | 112724                          | 6.0                  | 7.6                                            |
| 4          | 10             | 86729  | 162495 | 165889                          | 7.7                  | 13.2                                           |
| 5          | 15             | 69581  | 124779 | 128062                          | 11.6                 | 16.5                                           |
| 6          | 30             | 41619  | 69053  | 69396                           | 18.2                 | 24.4                                           |
| 7          | 45             | 43849  | 70888  | 68908                           | 20.3                 | 28.7                                           |
| 8          | 60             | 56886  | 89856  | 86004                           | 22.1                 | 31.4                                           |
| 9          | 90             | 54790  | 84282  | 78207                           | 24.2                 | 35.3                                           |
| 10         | 120            | 53453  | 81400  | 73722                           | 24.9                 | 37.4                                           |
| 11         | 150            | 40005  | 57444  | 52286                           | 29.2                 | 40.7                                           |
| 12         | 180            | 45243  | 64386  | 56969                           | 29.9                 | 42.9                                           |
| 13         | 240            | 40783  | 55188  | 47112                           | 33.3                 | 47.6                                           |
| 14         | 300            | 49202  | 65524  | 52645                           | 34.4                 | 51.5                                           |
| 15         | 360            | 69001  | 86282  | 66877                           | 38.4                 | 56.0                                           |

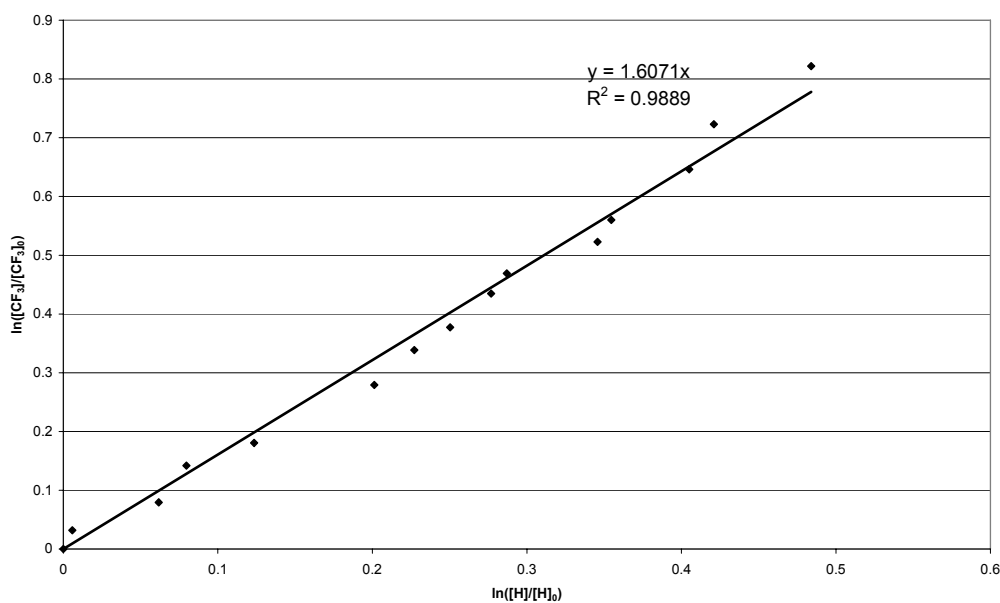

**Table 1, entry 5: Benzaldehyde and *para*-methyl-benzaldehyde:**

**Amounts of reagents used:**

|                                    | m (mg) |
|------------------------------------|--------|
| Benzaldehyde                       | 237.2  |
| 4-Methyl benzaldehyde              | 271.1  |
| Methanol                           | 8024.5 |
| NaOH                               | 16.7   |
| Anisole                            | 115.7  |
| Catalyst (1% Au/TiO <sub>2</sub> ) | 157.3  |

**Areas measured by GC:**

| Sample no. | Time (min)     | Anisol | PhCHO  | <i>p</i> CH <sub>3</sub> -PhCHO | Conversion PhCHO (%) | Conversion <i>p</i> Me <sub>3</sub> -PhCHO (%) |
|------------|----------------|--------|--------|---------------------------------|----------------------|------------------------------------------------|
| 1          | 0 – no cat.    | 63024  | 118297 | 143482                          | 0.0                  | 0.0                                            |
| 2          | 0 – after cat. | 44404  | 83274  | 98405                           | 0.1                  | 2.7                                            |
| 3          | 5              | 58344  | 105702 | 129164                          | 3.5                  | 2.8                                            |
| 4          | 10             | 60997  | 106298 | 131017                          | 7.2                  | 5.7                                            |
| 5          | 15             | 56016  | 94265  | 117431                          | 10.3                 | 7.9                                            |
| 6          | 30             | 39868  | 59853  | 73216                           | 20.0                 | 19.3                                           |
| 7          | 45             | 47481  | 66864  | 84623                           | 25.0                 | 21.7                                           |
| 8          | 60             | 39520  | 54223  | 68254                           | 26.9                 | 24.1                                           |
| 9          | 90             | 60533  | 79586  | 102753                          | 30.0                 | 25.4                                           |
| 10         | 120            | 54204  | 69031  | 90578                           | 32.2                 | 26.6                                           |
| 11         | 150            | 65246  | 80547  | 107285                          | 34.2                 | 27.8                                           |
| 12         | 180            | 63651  | 75584  | 101644                          | 36.7                 | 29.9                                           |
| 13         | 240            | 68848  | 75811  | 104574                          | 41.3                 | 33.3                                           |
| 14         | 300            | 47635  | 48178  | 67082                           | 46.1                 | 38.1                                           |

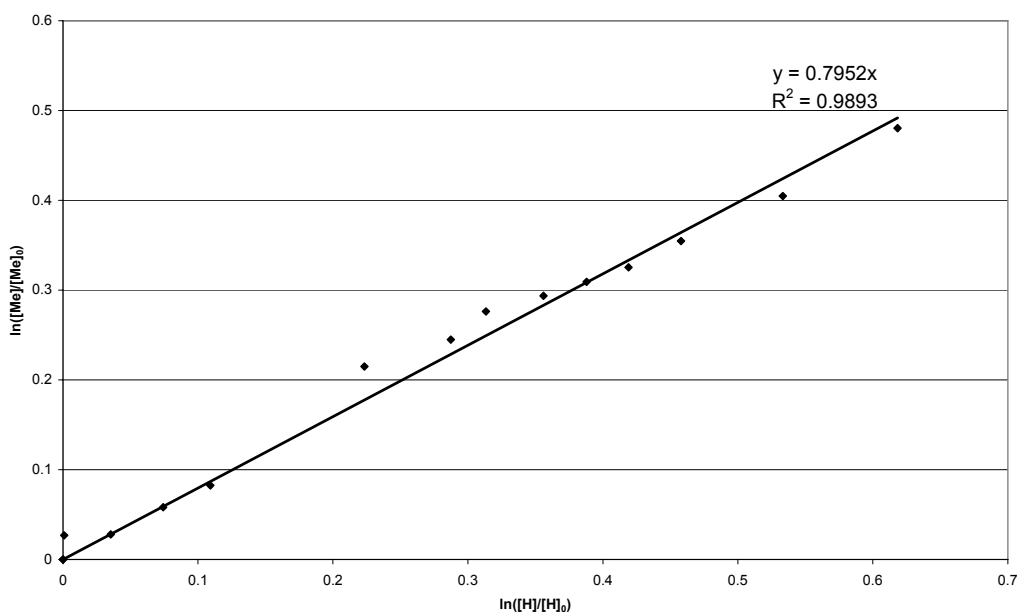



**Table 1, entry 6: Benzaldehyde and *para*-methoxy benzaldehyde:**

**Amounts of reagents used:**

|                                    | Added amount (mg) |
|------------------------------------|-------------------|
| Benzaldehyde                       | 219.5             |
| 4-Methoxy benzaldehyde             | 284.2             |
| Methanol                           | 8458.6            |
| NaOH                               | 19.4              |
| Anisol                             | 139.0             |
| Catalyst (1% Au/TiO <sub>2</sub> ) | 157.5             |

**Areas measured by GC:**

| Sample no. | Time (min)     | Area (GC) Anisol | Area (GC) PhCHO | Area (GC) <i>p</i> OMe-PhCHO | Conversion PhCHO (%) | Conversion <i>p</i> OMe-PhCHO (%) |
|------------|----------------|------------------|-----------------|------------------------------|----------------------|-----------------------------------|
| 1          | 0 – no cat.    | 122271           | 176415          | 177542                       | 0.0                  | 0.0                               |
| 2          | 0 – after cat. | 103978           | 145980          | 145642                       | 2.7                  | 3.5                               |
| 3          | 5              | 109952           | 145584          | 151387                       | 8.2                  | 5.2                               |
| 4          | 10             | 81347            | 97091           | 104303                       | 17.3                 | 11.7                              |
| 5          | 15             | 80247            | 91556           | 102528                       | 20.9                 | 12.0                              |
| 6          | 30             | 81158            | 81830           | 99369                        | 30.1                 | 15.7                              |
| 7          | 45             | 109529           | 105213          | 136737                       | 33.4                 | 14.0                              |
| 8          | 60             | 96211            | 88769           | 116253                       | 36.1                 | 16.8                              |
| 9          | 90             | 86855            | 73619           | 103860                       | 41.3                 | 17.6                              |
| 10         | 120            | 97685            | 77711           | 106048                       | 44.9                 | 25.2                              |
| 11         | 150            | 110841           | 74080           | 125303                       | 53.7                 | 22.1                              |
| 12         | 180            | 113302           | 80076           | 123843                       | 51.0                 | 24.7                              |
| 13         | 240            | 106996           | 66202           | 112663                       | 57.1                 | 27.5                              |
| 14         | 300            | 82013            | 44993           | 80709                        | 62.0                 | 32.2                              |

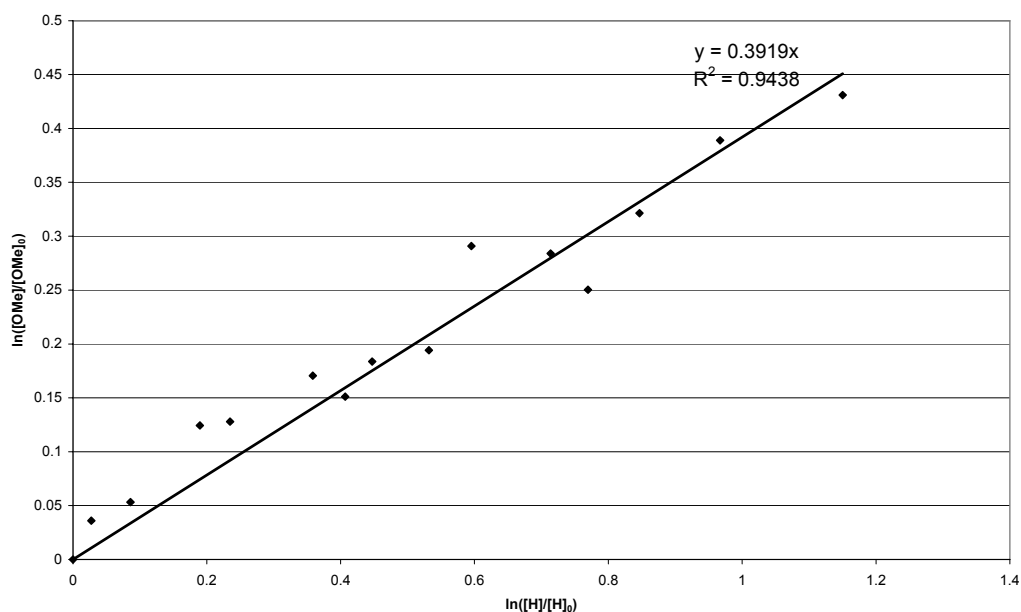

## Kinetic Isotope Effect, Indirect Determination: PhCDO vs. *p*Me-PhCHO

### Amounts of reagents used:

|                                    | Added amount (mg) |
|------------------------------------|-------------------|
| <i>d</i> -Benzaldehyde             | 227.3             |
| 4-Methyl benzaldehyde              | 259.9             |
| Methanol                           | 9246.4            |
| NaOH                               | 18.6              |
| Anisol                             | 113.0             |
| Catalyst (1% Au/TiO <sub>2</sub> ) | 157.9             |

### Areas measured by GC:

| Sample no. | Time (min)     | Area (GC) Anisol | Area (GC) PhCDO | Area (GC) <i>p</i> Me-PhCHO | Conversion PhCDO (%) | Conversion <i>p</i> Me-PhCHO (%) |
|------------|----------------|------------------|-----------------|-----------------------------|----------------------|----------------------------------|
| 1          | 0 – no cat.    | 63329            | 123916          | 121622                      | 0.0                  | 0.0                              |
| 2          | 0 – after cat. | 57577            | 111617          | 109877                      | 0.9                  | 0.6                              |
| 3          | 5              | 54357            | 101891          | 98001                       | 4.2                  | 6.1                              |
| 4          | 10             | 46813            | 84990           | 79025                       | 7.2                  | 12.1                             |
| 5          | 15             | 51842            | 91428           | 84313                       | 9.9                  | 15.3                             |
| 6          | 30             | 35874            | 59210           | 46372                       | 15.6                 | 32.7                             |
| 7          | 45             | 61141            | 100777          | 82480                       | 15.8                 | 29.8                             |
| 8          | 60             | 41299            | 66154           | 50972                       | 18.1                 | 35.7                             |
| 9          | 90             | 66943            | 104727          | 80740                       | 20.0                 | 37.2                             |
| 10         | 120            | 42704            | 64460           | 46042                       | 22.9                 | 43.9                             |
| 11         | 150            | 47653            | 71146           | 49425                       | 23.7                 | 46.0                             |
| 12         | 180            | 67616            | 99944           | 69228                       | 24.5                 | 46.7                             |
| 13         | 240            | 52135            | 72604           | 46586                       | 28.8                 | 53.5                             |
| 14         | 300            | 59971            | 81274           | 49208                       | 30.7                 | 57.3                             |
| 15         | 360            | 60755            | 78305           | 43775                       | 34.1                 | 62.5                             |

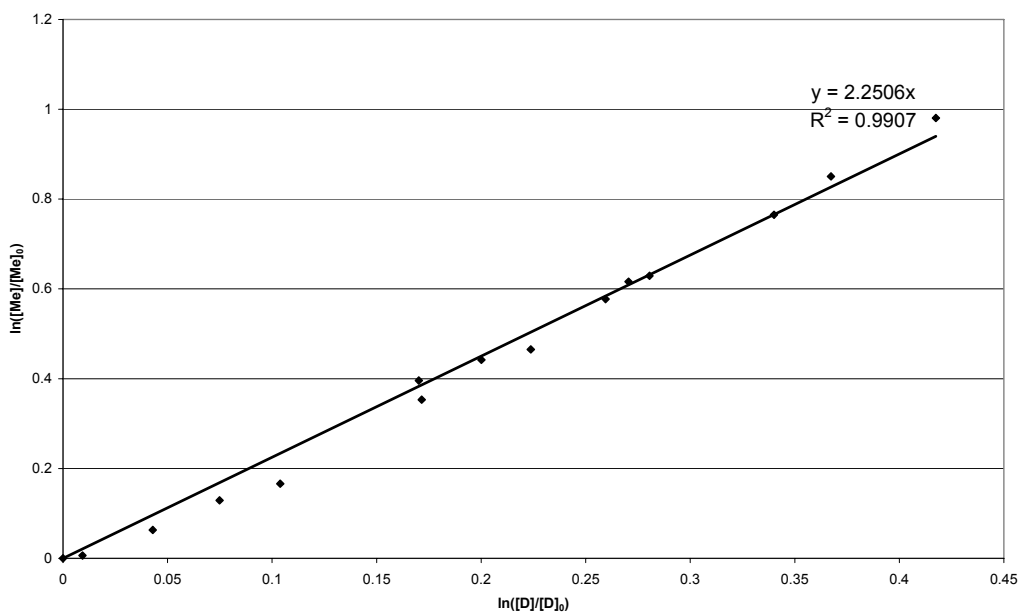

## Kinetic Isotope Effect, Direct Determination: PhCHO vs. PhCDO

### Amounts of reagents used:

|                                    | Added amount (mg) |
|------------------------------------|-------------------|
| Benzaldehyde                       | 227.3             |
| <i>d</i> -Benzaldehyde             | 259.9             |
| Methanol                           | 9246.4            |
| NaOH                               | 18.6              |
| Anisol                             | 113.0             |
| Catalyst (1% Au/TiO <sub>2</sub> ) | 157.9             |

### Areas measured by GC:

| Sample no. | Time (min)     | Area (MS) Anisol | Area (MS) PhCDO | Area (MS) <i>p</i> Me-PhCHO | Conversion PhCHO (%) | Conversion PhCDO (%) |
|------------|----------------|------------------|-----------------|-----------------------------|----------------------|----------------------|
| 1          | 0 – no cat.    | 422446           | 775025          | 842560                      | 0.0                  | 0.0                  |
| 2          | 0 – after cat. | 409387           | 722321          | 803709                      | 3.8                  | 1.6                  |
| 3          | 5              | 391750           | 642686          | 757165                      | 10.6                 | 3.1                  |
| 4          | 10             | 684540           | 1017293         | 1268386                     | 19.0                 | 7.1                  |
| 5          | 15             | 520036           | 714569          | 931047                      | 25.1                 | 10.2                 |
| 6          | 30             | 483363           | 587933          | 832179                      | 33.7                 | 13.7                 |
| 7          | 45             | 698501           | 794418          | 1170985                     | 38.0                 | 15.9                 |
| 8          | 60             | 783373           | 848936          | 1288830                     | 40.9                 | 17.5                 |
| 9          | 90             | 469704           | 467450          | 751962                      | 45.8                 | 19.7                 |
| 10         | 120            | 874117           | 807624          | 1358301                     | 49.6                 | 22.1                 |
| 11         | 150            | 624129           | 543596          | 970111                      | 52.5                 | 22.1                 |
| 12         | 180            | 474663           | 376993          | 714409                      | 56.7                 | 24.5                 |
| 13         | 240            | 479678           | 320506          | 672289                      | 63.6                 | 29.7                 |
| 14         | 300            | 327057           | 187915          | 442121                      | 68.7                 | 32.2                 |

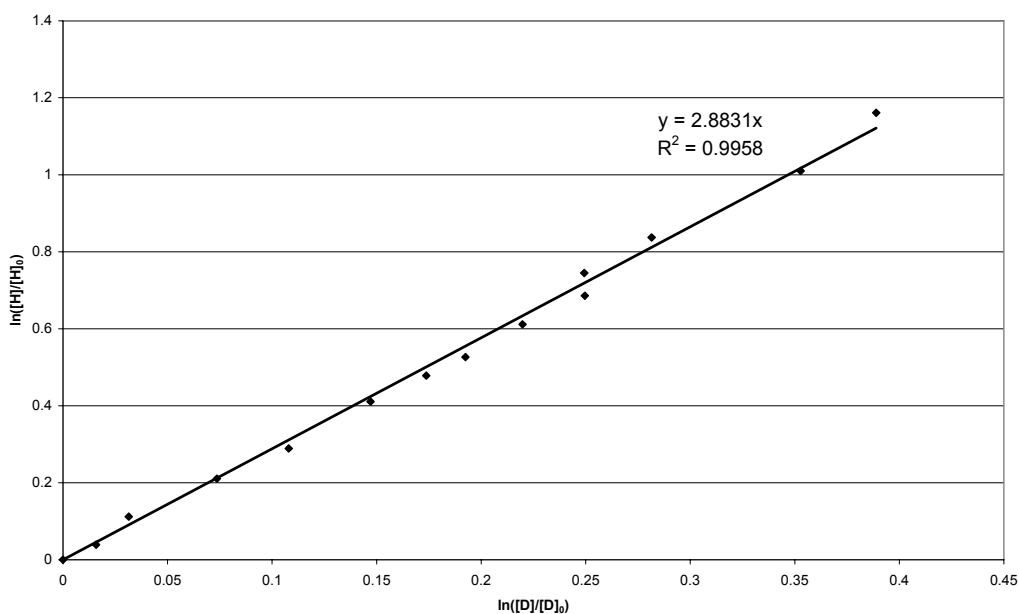

Supplement: b803270j.pdf [file b803270j.pdf]
